# Supplementary material for: Citrate-coated cobalt ferrite nanoparticles for the nano-enabled biofortification of wheat
Source: Royal Society of Chemistry journal article supplement (doi:10.1039/d2fo03835h), 2023-01-01
Supplement: d2fo03835h1.pdf [file d2fo03835h1.pdf]

### Citrate-coated cobalt ferrite nanoparticles for the nano-enabled biofortification of wheat

Yazmín Stefani Perea-Vélez<sup>a</sup>, Rogelio Carrillo González<sup>a</sup>, Ma. del Carmen A. González-Chávez<sup>a\*</sup>, Jaco Vangronsveld<sup>b,c</sup>, Iván Ortiz Monasterio<sup>d</sup>, Daniel Tapia Maruri<sup>e</sup>

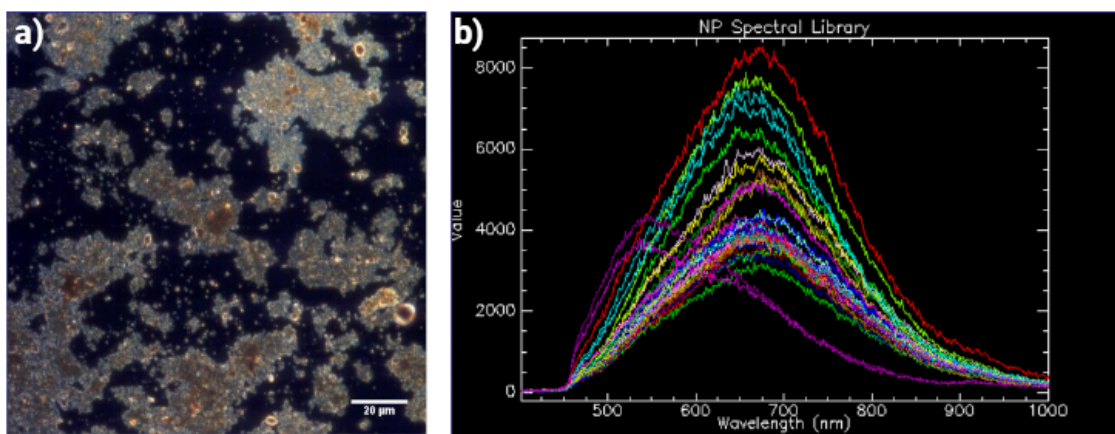

**Figure S1** Hyperspectral microscopy imaging analysis of citrate-coated  $\text{CoFe}_2\text{O}_4$  NPs. a) Enhanced darkfield optical image (60x) of NPs, and b) their spectral library.
