# Supplementary material for: Citrate-coated cobalt ferrite nanoparticles for the nano-enabled biofortification of wheat
Source: Royal Society of Chemistry journal article supplement (doi:10.1039/d2fo03835h), 2023-01-01
Supplement: d2fo03835h2.pdf [file d2fo03835h2.pdf]

## Citrate-coated cobalt ferrite nanoparticles for the nano-enabled biofortification of wheat

Yazmín Stefani Perea-Vélez<sup>a</sup>, Rogelio Carrillo González<sup>a</sup>, Ma. del Carmen A. González-Chávez<sup>a\*</sup>, Jaco Vangronsveld<sup>b,c</sup>, Iván Ortiz Monasterio<sup>d</sup>, Daniel Tapia Maruri<sup>e</sup>

**Table S1** Chemical properties of the soil used.

| Feature                          | Unit                                 | Value         | Interpretation <sup>†</sup> |
|----------------------------------|--------------------------------------|---------------|-----------------------------|
| pH                               |                                      | 7.71 ± 0.01   | Moderately alkaline         |
| EC                               | dS m <sup>-1</sup>                   | 2.24 ± 0.01   | Very slightly saline        |
| Organic matter                   |                                      | 5.70 ± 0.40   | High                        |
| N total                          | %                                    | 0.82 ± 0.07   |                             |
| N inorganic                      |                                      | 29.48 ± 5.48  | Medium                      |
| P (Olsen extraction)             | mg kg <sup>-1</sup>                  | 49.59 ± 13.95 | High                        |
| Exchangeable cations             |                                      |               |                             |
| Na                               |                                      | 1.00 ± 0.01   |                             |
| K                                |                                      | 5.39 ± 0.08   | High                        |
| Ca                               | cmol <sub>(+)</sub> kg <sup>-1</sup> | 88.93 ± 5.04  | High                        |
| Mg                               |                                      | 11.93 ± 0.80  | High                        |
| Micronutrients (DTPA extraction) |                                      |               |                             |
| Cu                               |                                      | 0.50 ± 0.02   | Adequate                    |
| Fe                               |                                      | 3.23 ± 0.31   | Marginal                    |
| Zn                               | mg kg <sup>-1</sup>                  | 1.21 ± 0.01   | Adequate                    |
| Mn                               |                                      | 14.87 ± 0.31  | Adequate                    |

Mean value and their standard deviation, n=3

<sup>†</sup>Interpretation according to the Mexican norm NOM-021-RECNAT-2000<sup>1</sup>.

1 Secretaría de Medio Ambiente y Recursos Naturales (SEMARNAT), 2000.
