# Supplementary material for: Citrate-coated cobalt ferrite nanoparticles for the nano-enabled biofortification of wheat
Source: Royal Society of Chemistry journal article supplement (doi:10.1039/d2fo03835h), 2023-01-01
Supplement: d2fo03835h4.pdf [file d2fo03835h4.pdf]

## Citrate-coated cobalt ferrite nanoparticles for the nano-enabled biofortification of wheat

Yazmín Stefani Perea-Vélez<sup>a</sup>, Rogelio Carrillo González<sup>a</sup>, Ma. del Carmen A. González-Chávez<sup>a\*</sup>, Jaco Vangronsveld<sup>b,c</sup>, Iván Ortiz Monasterio<sup>d</sup>, Daniel Tapia Maruri<sup>e</sup>

**Table S3** Properties of citrate coated CoFe<sub>2</sub>O<sub>4</sub> NPs

| Feature                          | Value          |
|----------------------------------|----------------|
| pH (supernatant)                 | 6.44           |
| Shape                            | Semi-spherical |
| Primary size (nm)                | 13.41±4.58     |
| Hydrodynamic diameter (nm)       | 216.06±10.46   |
| Polydispersity (%)               | 18.53±18.53    |
| Zeta potential (mV, in DI water) | 10.5 ±6.6      |
| Point of zero charge (pH)        | 6.8            |
| Fe composition (% by AAS)        | 48.48 ± 5.2    |
| Co composition (% by AAS)        | 29.37 ± 1.8    |
| Maximum repulsive potential (nm) | 9              |

AAS, atomic absorption Spectrophotometry; DI, Deionized water; Data from Perea-Vélez et al. <sup>1</sup>

- 1 Y. S. Perea-Velez, M. del C. A. González Chávez, R. Carrillo-González and J. Lopez-Luna, Dissolution kinetics of citrate coated CoFe<sub>2</sub>O<sub>4</sub> nanoparticles in soil solution, *Environ. Sci. Nano*, 2022, **9**, 2954–2965. DOI:10.1039/D2EN00330A.
