# Supplementary material for: Citrate-coated cobalt ferrite nanoparticles for the nano-enabled biofortification of wheat
Source: Royal Society of Chemistry journal article supplement (doi:10.1039/d2fo03835h), 2023-01-01
Supplement: d2fo03835h6.pdf [file d2fo03835h6.pdf]

## Citrate-coated cobalt ferrite nanoparticles for the nano-enabled biofortification of wheat

Yazmín Stefani Perea-Vélez<sup>a</sup>, Rogelio Carrillo González<sup>a</sup>, Ma. del Carmen A. González-Chávez<sup>a\*</sup>, Jaco Vangronsveld<sup>b,c</sup>, Iván Ortiz Monasterio<sup>d</sup>, Daniel Tapia Maruri<sup>e</sup>

**Table S5** Estimated production cost (MXN) for the wheat crop of the top three Mexican states producing wheat.

| Prices per ha     | Sonora (2019) | Baja California (2020) | Sinaloa (2021) | Average |
|-------------------|---------------|------------------------|----------------|---------|
| Sowing            | \$2,381       | \$2,215                | \$2,558        | \$2,385 |
| Labor cost        | \$168         | \$186                  | \$667          | \$340   |
| Irrigation        | \$2,402       | \$2,250                | \$2,385        | \$2,346 |
| Pest control      | \$3,708       | \$2,914                | \$1,748        | \$2,790 |
| Harvesting        | \$1,416       | \$2,430                | \$2,357        | \$2,068 |
| Commercialization | \$3,004       | \$3,259                | \$2,993        | \$3,085 |
| Miscellaneous     | \$1,973       | \$2,051                | \$1,865        | \$1,963 |

Source: FIRA<sup>1</sup>

1 FIRA, Agrocostos Interactivo, <https://www.fira.gob.mx/agrocostosApp/AgroApp.jsp>, (accessed 13 October 2022).
