# Supplementary material for: Citrate-coated cobalt ferrite nanoparticles for the nano-enabled biofortification of wheat
Source: Royal Society of Chemistry journal article supplement (doi:10.1039/d2fo03835h), 2023-01-01
Supplement: d2fo03835h7.pdf [file d2fo03835h7.pdf]

## Citrate-coated cobalt ferrite nanoparticles for the nano-enabled biofortification of wheat

Yazmín Stefani Perea-Vélez<sup>a</sup>, Rogelio Carrillo González<sup>a</sup>, Ma. del Carmen A. González-Chávez<sup>a\*</sup>, Jaco Vangronsveld<sup>b,c</sup>, Iván Ortiz Monasterio<sup>d</sup>, Daniel Tapia Maruri<sup>e</sup>

**Table S6** The estimated cost of NPs production at the laboratory scale and NPs cost in the market.

| Reagents                                             | Units     | Cost for unit    | Cost (MXN) | Cost (USD) |
|------------------------------------------------------|-----------|------------------|------------|------------|
| Fe(NO <sub>3</sub> ) <sub>3</sub> *9H <sub>2</sub> O | 4.3 kg    | 2992.8 (MXN/kg)  | 12,869     | 645        |
| Co(NO <sub>3</sub> ) <sub>2</sub> *6H <sub>2</sub> O | 1.5 kg    | 11089.6 (MXN/kg) | 16,634     | 833        |
| NaOH                                                 | 3.03 kg   | 670.48 (MXN/kg)  | 2,032      | 102        |
| Sodium citrate                                       | 78.42 g   | 1018.35 (MXN/kg) | 80         | 4          |
| Distilled water                                      | 4133.25 L | 34.67 (MXN/L)    | 143,300    | 7,179      |
| Energy                                               | 2000 h    | 79.81 (MXN/h)    | 159,620    | 7,997      |
| Technician                                           | 4000 (h)  | 41.66 (MXN/h)    | 166,640    | 8,349      |
| Total                                                |           |                  | 501,175    | 25,109     |

  

| Supplier                           | Cost (USD/kg) | Source       |
|------------------------------------|---------------|--------------|
| NanoChemazone                      | 5,750         | <sup>1</sup> |
| Sigma aldrich                      | 19,400        | <sup>2</sup> |
| Sisco Reseach laboratories Pvt.Ltd | 17,174        | <sup>3</sup> |

- 1 Nanochemazone, Cobalt Ferrite Nanoparticles, <https://www.nanochemazone.com/product/cobalt-ferrite-nanoparticles/>, (accessed 13 October 2022).
- 2 Sigma-Aldrich, Cobalt iron oxide nanopowder, <https://www.sigmaaldrich.com/US/en/product/aldrich/773352>, (accessed 13 October 2022).
- 3 S. R. Laboratories, Cobalt iron oxide nanopowder, <https://www.srlchem.com/products/compound/Cobalt-Ferrite-Nanopowder/31570>, (accessed 9 November 2022).
