# Supplementary material for: Citrate-coated cobalt ferrite nanoparticles for the nano-enabled biofortification of wheat
Source: Royal Society of Chemistry journal article supplement (doi:10.1039/d2fo03835h), 2023-01-01
Supplement: d2fo03835h8.pdf [file d2fo03835h8.pdf]

### Citrate-coated cobalt ferrite nanoparticles for the nano-enabled biofortification of wheat

Yazmín Stefani Perea-Vélez<sup>a</sup>, Rogelio Carrillo González<sup>a</sup>, Ma. del Carmen A. González-Chávez<sup>a\*</sup>, Jaco Vangronsveld<sup>b,c</sup>, Iván Ortiz Monasterio<sup>d</sup>, Daniel Tapia Maruri<sup>e</sup>

**Table S7** Degree of biofortification in wheat grains of three different wheat lines fertilized with Fe-EDTA or citrate-coated CoFe<sub>2</sub>O<sub>4</sub> NPs by soil or foliar applications.

| Genotype | Type application   | Treatment     | Degree of biofortification (%) |
|----------|--------------------|---------------|--------------------------------|
| AF1104   | Soil application   | Fe-EDTA       | 6.60±23.39                     |
|          |                    | NPs 46        | 3.04±8.46                      |
|          |                    | NPs 68        | -7.40±10.76                    |
|          | Foliar application | Fe-EDTA       | 9.59±21.83                     |
|          |                    | NPs           | 27.02±33.23                    |
|          |                    | <b>Mean</b>   | <b>7.77±21.57 B</b>            |
| AF1116   | Soil application   | Fe-EDTA       | 78.28±96.77 b                  |
|          |                    | NPs 46        | 6.11±11.41 b                   |
|          |                    | NPs 68        | 394.41±121.19 a                |
|          | Foliar application | Fe-EDTA       | 21.35±11.80 b                  |
|          |                    | NPs           | 42.00±14.61 b                  |
|          |                    | <b>Mean</b>   | <b>109.02±161.02 A</b>         |
| MULTIAF2 | Soil application   | Fe-EDTA       | -10.28±7.27 b                  |
|          |                    | NPs 46        | -25.48±21.50 b                 |
|          |                    | NPs 68        | 27.09±5.61 a                   |
|          | Foliar application | Fe-EDTA       | -37.82±4.06 b                  |
|          |                    | NPs           | -31.96±8.75 b                  |
|          |                    | <b>Mean</b>   | <b>-15.69±25.92 C</b>          |
|          | Soil application   | Fe-EDTA       | 24.86±30.81 b                  |
|          |                    | NPs 46        | -5.44±19.84 b                  |
|          |                    | NPs 68        | 138.03±202.25 a                |
|          | Foliar application | Fe-EDTA       | -1.29±30.81 b                  |
| NPs      |                    | 12.35±38.67 b |                                |
