# Supplementary material for: Citrate-coated cobalt ferrite nanoparticles for the nano-enabled biofortification of wheat
Source: Royal Society of Chemistry journal article supplement (doi:10.1039/d2fo03835h), 2023-01-01
Supplement: d2fo03835h9.pdf [file d2fo03835h9.pdf]

### Citrate-coated cobalt ferrite nanoparticles for the nano-enabled biofortification of wheat

Yazmín Stefani Perea-Vélez<sup>a</sup>, Rogelio Carrillo González<sup>a</sup>, Ma. del Carmen A. González-Chávez<sup>a\*</sup>, Jaco Vangronsveld<sup>b,c</sup>, Iván Ortiz Monasterio<sup>d</sup>, Daniel Tapia Maruri<sup>e</sup>

**Table S8** The concentration of soluble polysaccharide fractions and free amino acids in wheat grains

| Genotype           | Type application   | Treatment        | Glucose (μmol/g) | Fructose (μmol/g) | Saccharose (μmol/g) | Free aminoacids as glicine (mM/kg) |
|--------------------|--------------------|------------------|------------------|-------------------|---------------------|------------------------------------|
| MULTIAF2           | Soil application   | Control          | 3.25±1.10        | 0.05±0.01 b A     | 13.70±0.59 b        | 11.75±1.14                         |
|                    |                    | Fe-EDTA          | 3.22±1.19        | 0.11±0.02 a       | 21.54±4.05 a A      | 14.77±3.26                         |
|                    |                    | NPs 46           | 3.34±2.29        | 0.07±0.03 ab B    | 18.62±2.08 ab       | 18.75±7.11                         |
|                    |                    | NPs 68           | 3.74±2.00        | 0.07±0.03 ab      | 14.95±0.89 b        | 12.52±0.45                         |
|                    | Foliar application | Fe-EDTA          | 3.03±1.19        | 0.07±0.01 ab      | 13.90±1.51 b        | 15.62±6.78                         |
|                    |                    | NPs              | 2.52±0.58        | 0.07±0.02 ab      | 15.68±0.92 b        | 11.67±1.56                         |
|                    |                    | Mean             | 3.18 ±1.32       | 0.07 ±0.03        | 16.39±3.37          | 14.18 ±4.45                        |
|                    | AF1104             | Soil application | Control          | 0.89±1.15         | 0.06±0.01           | 14.72±5.37                         |
| Fe-EDTA            |                    |                  | 3.99±0.72        | 0.05±0.03         | 18.13±3.98          | 13.35±1.18                         |
| NPs 46             |                    |                  | 2.77±1.16        | 0.09±0.03         | 15.00±5.15          | 9.98±0.84                          |
| NPs 68             |                    |                  | 1.34±2.13        | 0.05±0.02         | 14.10±1.88          | 15.30±4.80                         |
| Foliar application |                    | Fe-EDTA          | 2.93±0.84        | 0.07±0.03         | 17.14±0.23          | 12.42±2.71                         |
|                    |                    | NPs              | 0.81±0.78        | 0.06±0.01         | 15.75±1.99          | 12.21±2.24                         |
|                    |                    | Mean             | 2.12±1.60        | 0.06±0.02         | 15.80±3.37          | 12.63±2.96                         |
| AF1116             |                    | Soil application | Control          | 2.83±1.17         | 0.05±0.01 A         | 14.51±0.66                         |
|                    | Fe-EDTA            |                  | 2.77±2.94        | 0.07±0.04         | 13.63±2.11          | 12.93±0.77                         |
|                    | NPs 46             |                  | 0.41±0.73        | 0.07±0.02         | 13.14±1.49 B        | 11.88±3.30                         |
|                    | NPs 68             |                  | 3.25±2.59        | 0.05±0.02         | 17.57±1.27          | 12.63±2.79                         |
|                    | Foliar application | Fe-EDTA          | 1.23±0.98        | 0.10±0.02         | 14.50±3.59          | 19.13±3.51                         |
|                    |                    | NPs              | 2.17±0.67        | 0.08±0.02         | 17.40±0.83          | 20.54±5.95                         |
|                    |                    | Mean             | 2.11±1.80        | 0.07±0.03         | 15.12±2.40          | 15.49±2.95                         |

Mean±standar deviation of n=3. Different lowercase letters represent significant differences (Tukey α=0.05) between treatment within the line. Capital letters represent differences due to the treatment\*line effect.
